# Supplementary material for: Liver-specific adiponectin gene therapy suppresses microglial NLRP3-inflammasome activation for treating Alzheimer’s disease
Source: Springer Nature journal article supplement (doi:10.1186/s12974-024-03066-y), 2024-03-27
Supplement: MOESM1 [file 26898932]

# Supplementary Figure 1

A

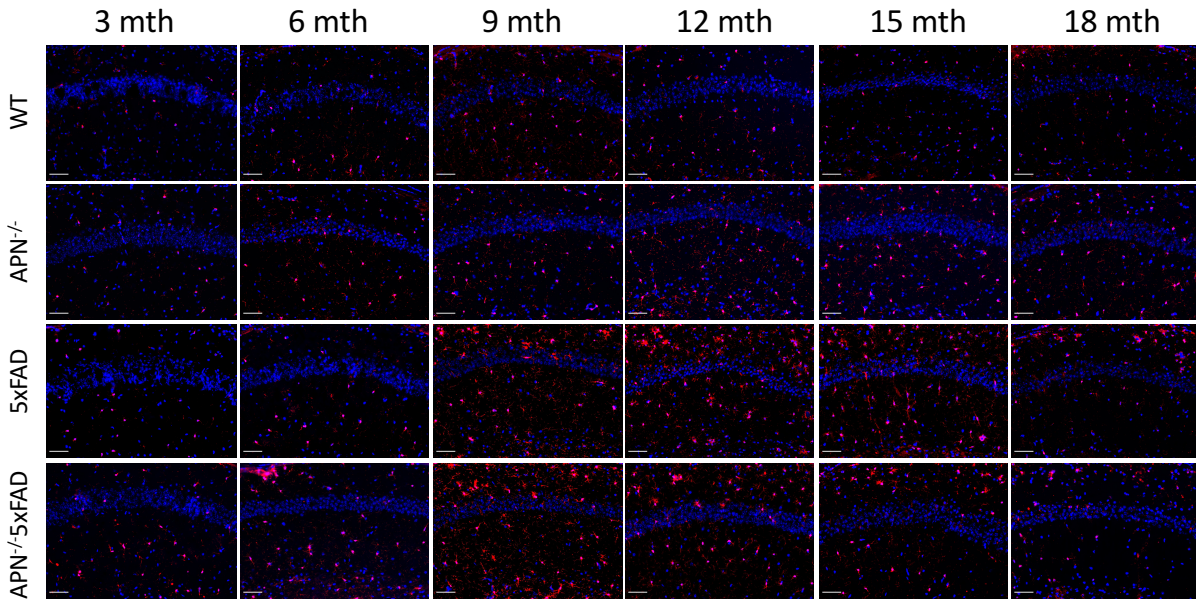

B

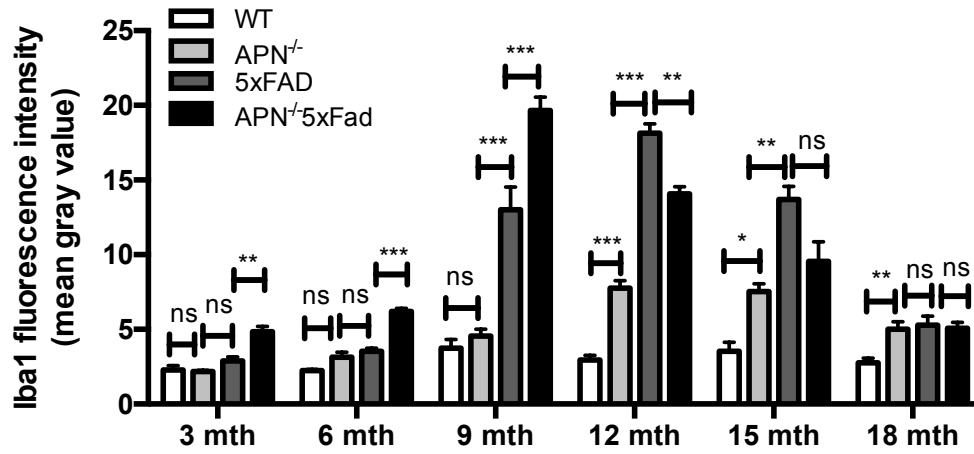

## Supplementary Figure 2

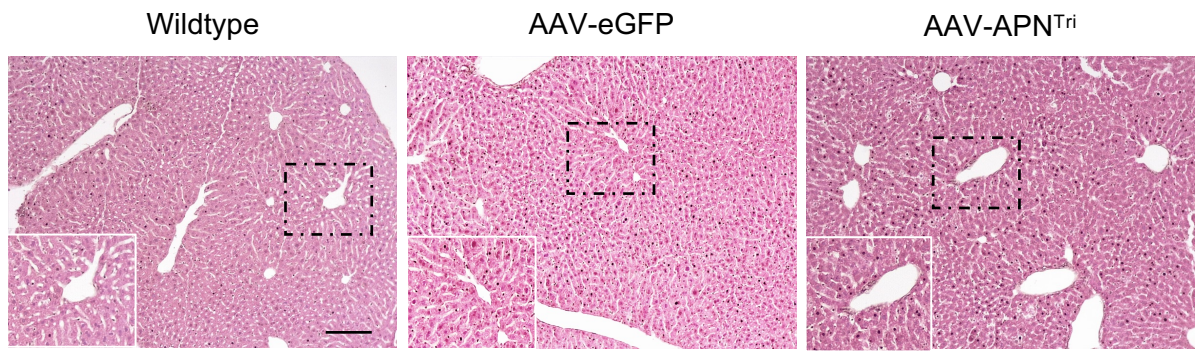

# Supplementary Figure 3

A

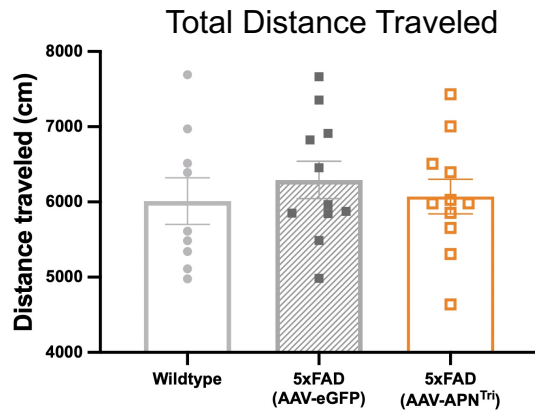

B

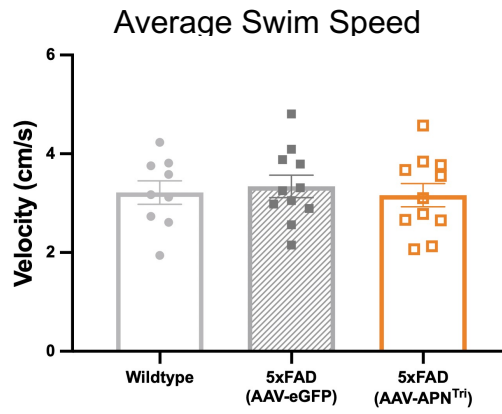

C

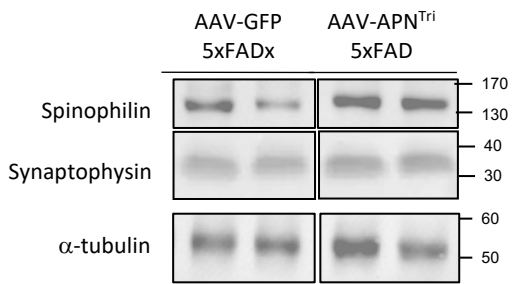

D

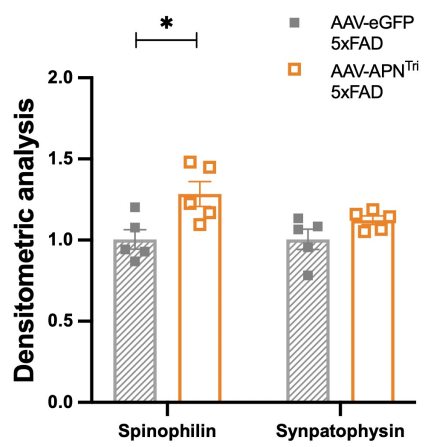

# Supplementary Figure 4

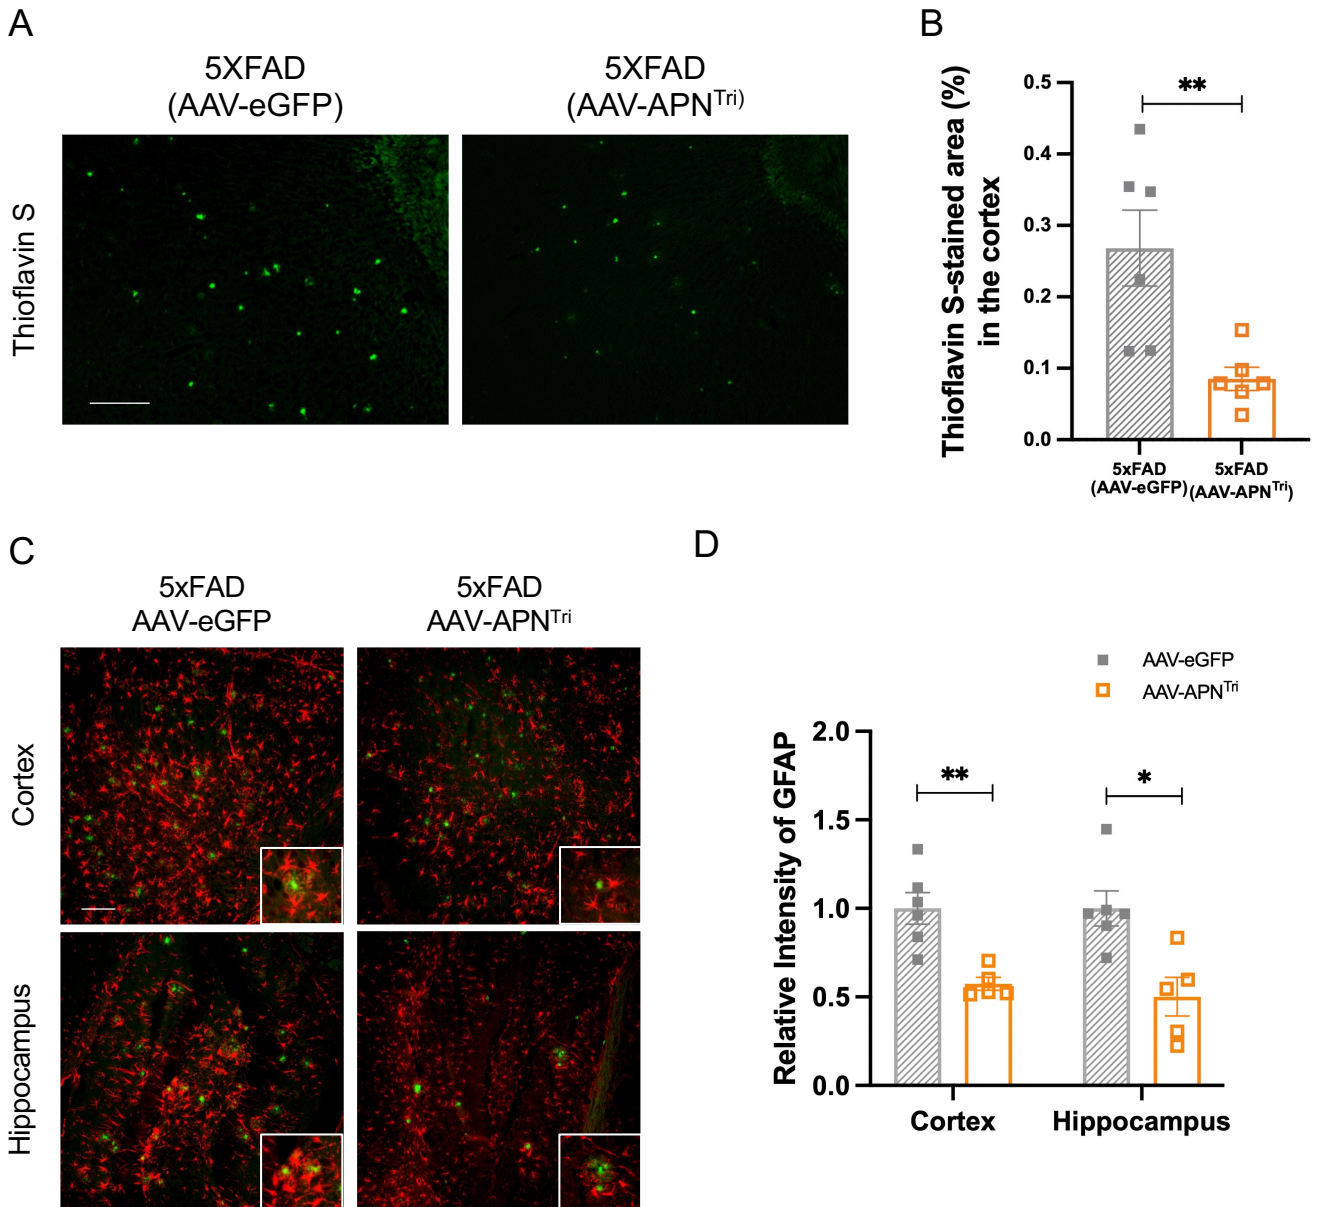

**Supplementary Table 1. Body Weights, Weight Changes and Liver Weights 20 weeks after AAV2/8 administration**

|                                   | Wildtype       | 5xFAD           | 5xFAD<br>(AAV-eGFP) | 5xFAD<br>(AAV-APN <sup>Tri</sup> ) |
|-----------------------------------|----------------|-----------------|---------------------|------------------------------------|
| Weight (g)                        | 30.600 ± 0.675 | 28.541 ± 0.799  | 28.490 ± 0.377      | 29.403 ± 0.797                     |
| Weight Change (g)                 | 1.85 ± 0.3252  | 0.9075 ± 0.4844 | 0.7573 ± 0.3975     | 0.9522 ± 0.1407                    |
| Liver (g)                         | 1.720 ± 0.025  | 1.600 ± 0.384   | 1.657 ± 0.020       | 1.682 ± 0.019                      |
| Liver weight / Body Weight (mg/g) | 59.96 ± 1.07   | 56.16 ± 1.06    | 58.25 ± 0.89        | 57.49 ± 1.14                       |
